# Supplementary material for: The IRAK4 scaffold integrates TLR4-driven TRIF and MYD88 signaling pathways
Source: PubMed Central journal article supplement — Cell Rep. Author manuscript; Available in PMC 2022 Sep 6. (PMC9446533; doi:10.1016/j.celrep.2022.111225), 2022-08-16
Supplement: NIHMS1830644-supplement-1.pdf [file NIHMS1830644-supplement-1.pdf]

**Cell Reports, Volume 40**

**Supplemental information**

**The IRAK4 scaffold integrates TLR4-driven  
TRIF and MYD88 signaling pathways**

**Milton Pereira, Danielle F. Durso, Clare E. Bryant, Evelyn A. Kurt-Jones, Neal Silverman, Douglas T. Golenbock, and Ricardo T. Gazzinelli**

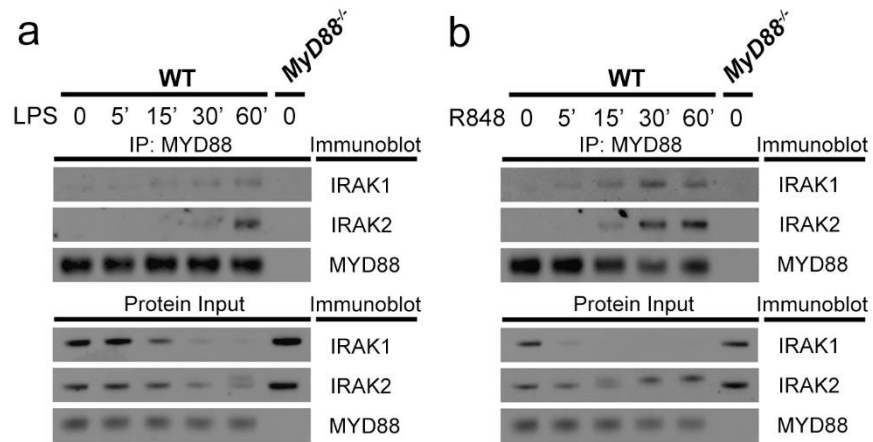

**Figure S1 – MYD88 co-immunoprecipitation kinetics, Related to Figures 1, 2 and 4.**

**(a-b)** Immunoblot analysis of MYD88 co-immunoprecipitation with IRAK1 and IRAK2 in WT BMDMs treated for up to 60 minutes with LPS **(a)** or R848 **(b)**. Stimulations were done with LPS 100 ng mL<sup>-1</sup> or R848 1 µg mL<sup>-1</sup>. Images are representative of three independent experiments.

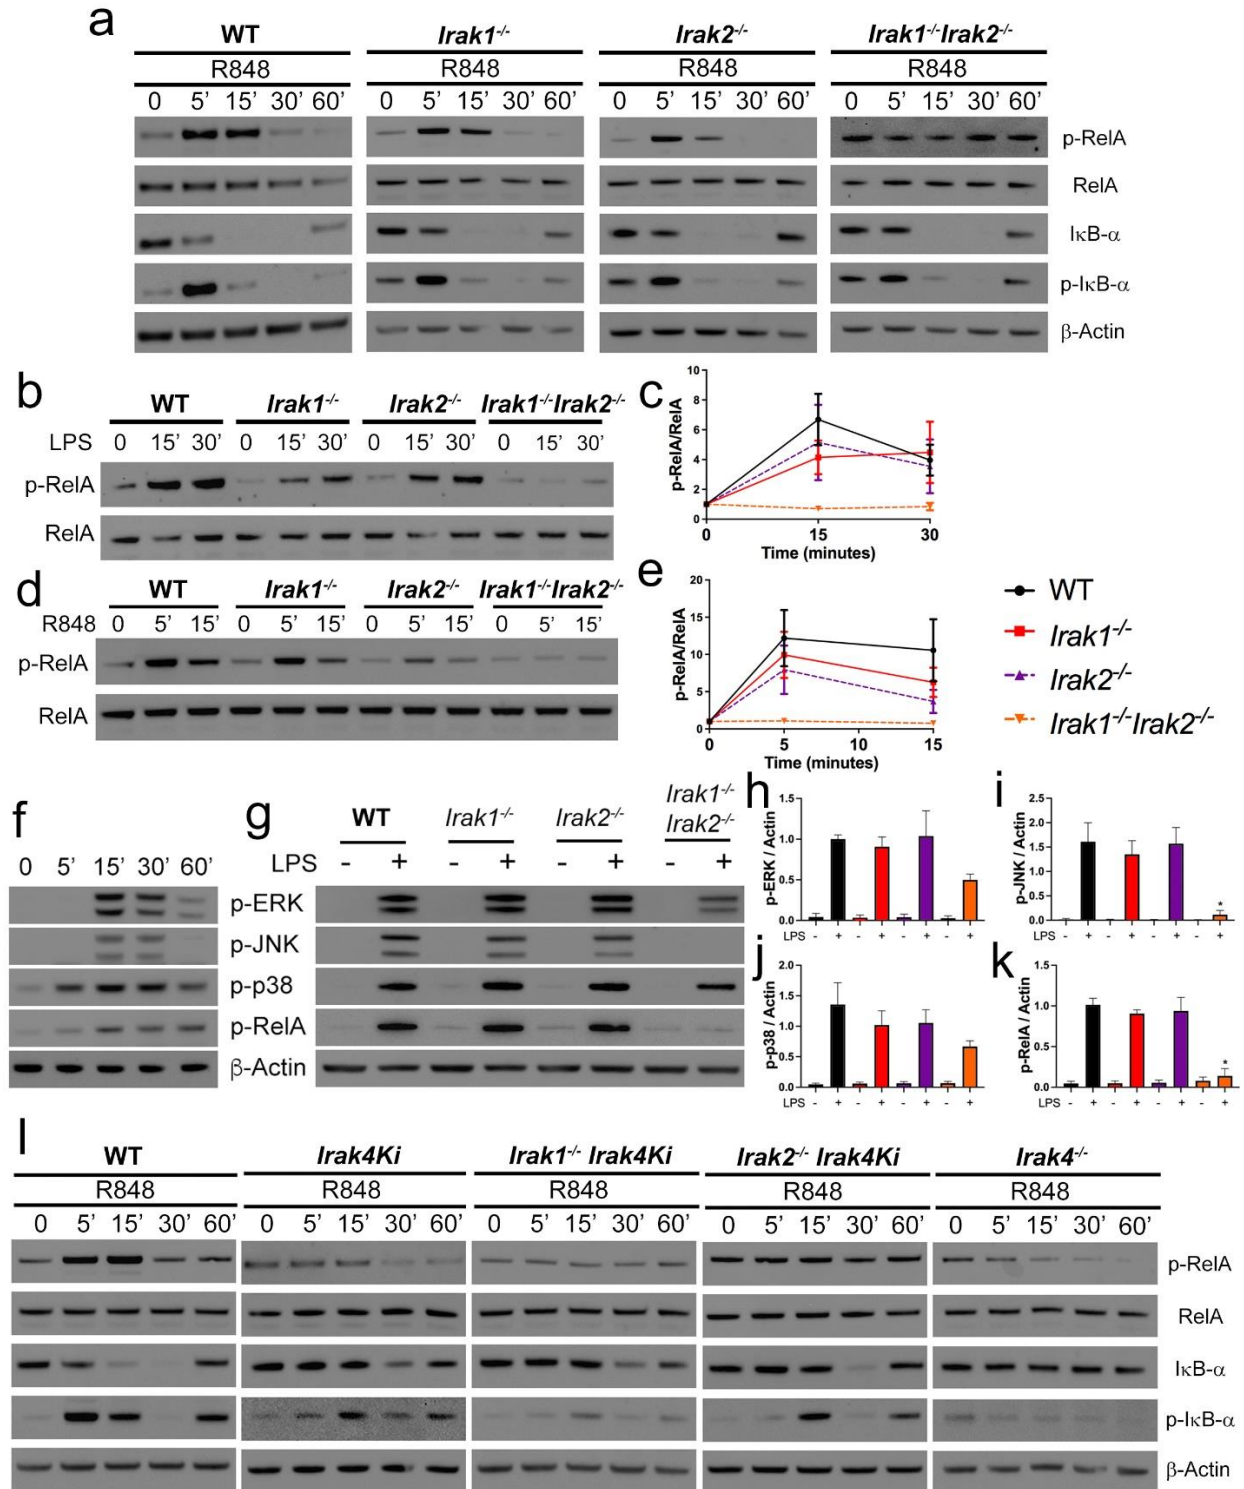

**Figure S2 – NF- $\kappa$ B and MAPK activation in IRAK-deficient cells, Related to Figures 1 and 2.**

(a) Kinetic study of p-RelA, RelA, I $\kappa$ B- $\alpha$ , p-I $\kappa$ B- $\alpha$  and  $\beta$ -actin by immunoblot of whole cell lysates from WT, *Irak1*<sup>-/-</sup>, *Irak2*<sup>-/-</sup> and *Irak1*<sup>-/-</sup>*Irak2*<sup>-/-</sup> BMDMs treated with R848 for up to 60 minutes. (b-e) RelA phosphorylation and densitometric quantifications in WT, *Irak1*<sup>-/-</sup>, *Irak2*<sup>-/-</sup> and *Irak1*<sup>-/-</sup>*Irak2*<sup>-/-</sup> BMDMs treated with LPS for up to 30 minutes (b-c) or R848 for up to 15 minutes (d-e). (f) Kinetic study of p-ERK, p-JNK, p-p38, p-RelA and  $\beta$ -actin by

immunoblot of whole cell lysates from WT, BMDMs treated with LPS for up to 60 minutes. **(g-k)** ERK, JNK, p38 and RelA phosphorylation and densitometric quantifications in relation to  $\beta$ -actin in WT, *Irak1*<sup>-/-</sup>, *Irak2*<sup>-/-</sup> and *Irak1*<sup>-/-</sup> *Irak2*<sup>-/-</sup> BMDMs unstimulated or stimulated with LPS for 15 minutes. **(l)** Kinetic study of p-RelA, RelA, I $\kappa$ B- $\alpha$ , p-I $\kappa$ B- $\alpha$  and  $\beta$ -actin by immunoblot of whole cell lysates from WT, *Irak4* Ki, *Irak1*<sup>-/-</sup> *Irak4* Ki, *Irak2*<sup>-/-</sup> *Irak4* Ki and *Irak4*<sup>-/-</sup> BMDMs treated with R848 for up to 60 minutes. All stimulations were done with LPS 100 ng mL<sup>-1</sup> or R848 1  $\mu$ g mL<sup>-1</sup>. Images are representative of two **(f)**, three **(a, b, d, l)**, or four **(g)** independent experiments. Data from three **(c,e)** or four **(h-k)** independent experiments (mean and s.e.m.).

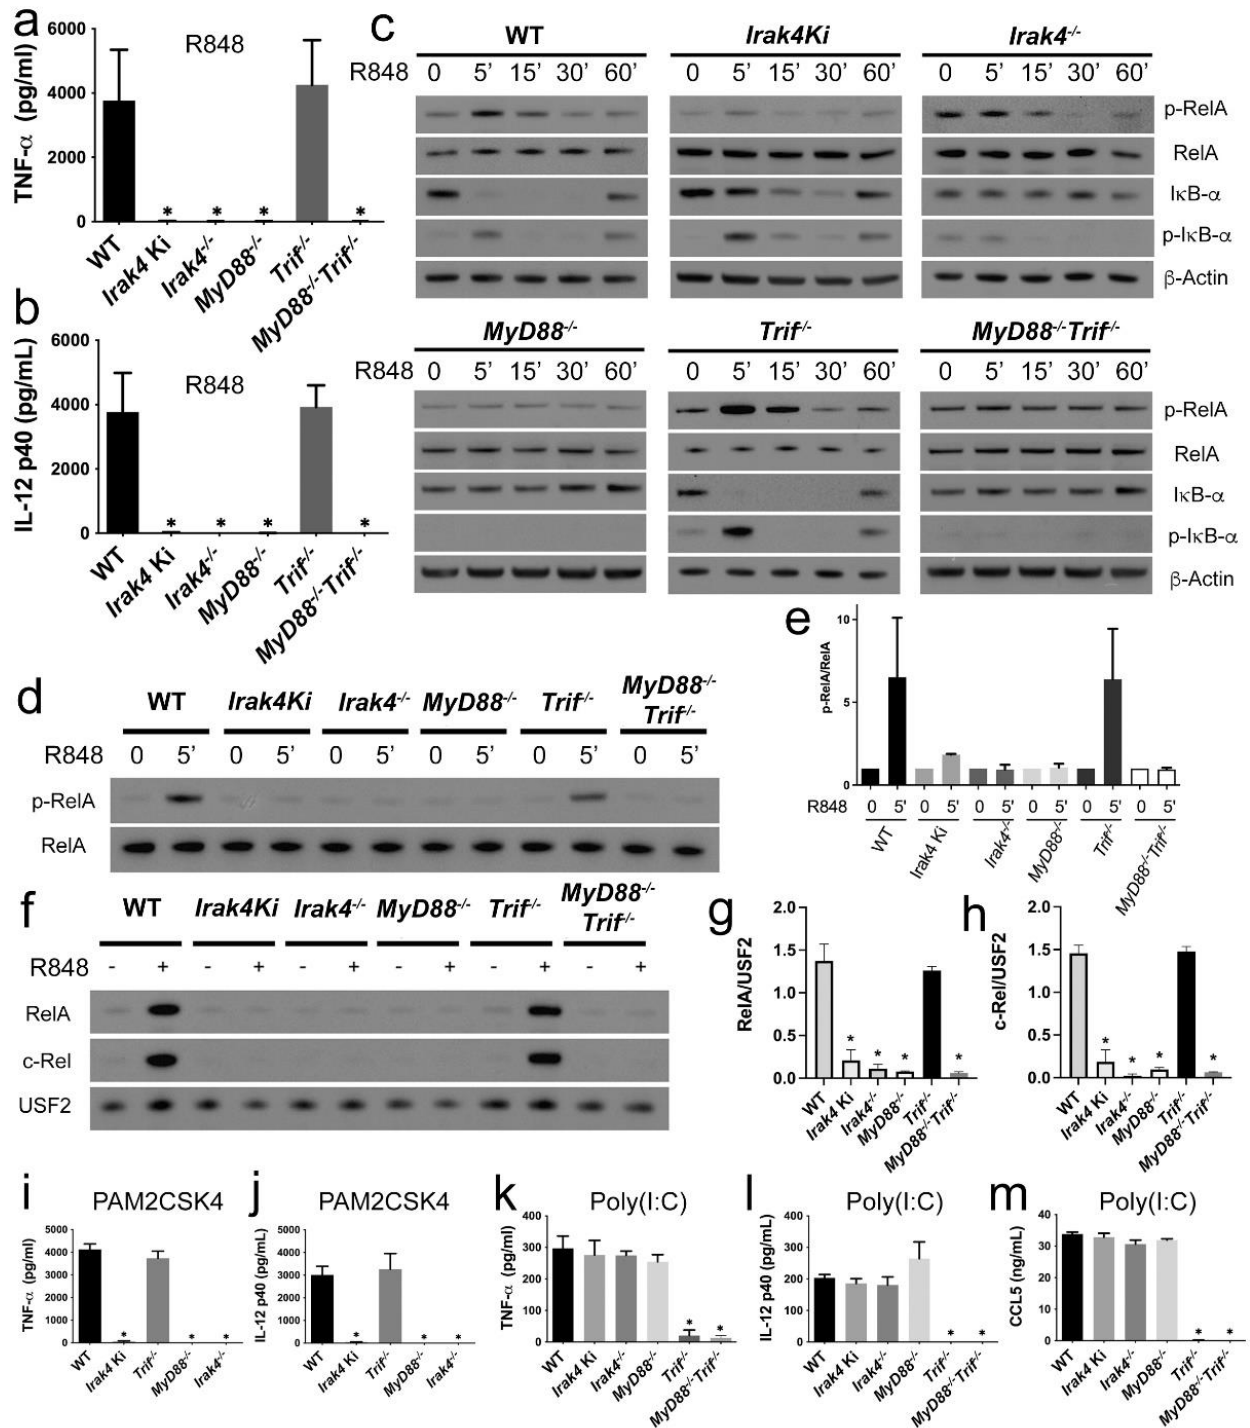

**Figure S3 – TLR-2 and -7 signaling requires IRAK4 kinase activity, Related to Figure 3.**

(a-h) Study of WT, *Irak4* Ki, *Irak4*<sup>-/-</sup>, *MyD88*<sup>-/-</sup>, *Trif*<sup>-/-</sup> and *MyD88*<sup>-/-</sup>*Trif*<sup>-/-</sup> BMDMs stimulated with R848. (a-b) Quantification of TNF- $\alpha$  (a) and IL-12 (b) produced after R848 stimulation for 24 hours. (c) Kinetic study of p-RelA, RelA, I $\kappa$ B- $\alpha$ , p-I $\kappa$ B- $\alpha$  and  $\beta$ -actin by immunoblot of whole cell lysates from indicated BMDM strains stimulated with R848 for up to 60 minutes. (d-e) Immunoblot comparison p-RelA/RelA in indicated BMDM strains stimulated with R848 (d) and densitometric quantification (e). (f) Immunoblot analysis of RelA and c-Rel in nuclear

lysates of WT, *Irak4* Ki, *Irak4*<sup>-/-</sup>, *MyD88*<sup>-/-</sup>, *Trif*<sup>-/-</sup> and *MyD88*<sup>-/-</sup>*Trif*<sup>-/-</sup> BMDMs untreated or treated with R848 for 15 minutes and densitometric quantification of R848-treated samples (**g-h**). (**i-j**) Quantification of TNF- $\alpha$  (**i**) and IL-12 (**j**) produced by WT, *Irak4* Ki, *Trif*<sup>-/-</sup>, *MyD88*<sup>-/-</sup> and *Irak4*<sup>-/-</sup> BMDMs after stimulation with Pam3CSK4 for 24 hours. (**k-m**) Quantification of TNF- $\alpha$  (**k**), IL-12 (**l**) and CCL5 (**m**) produced by WT, *Irak4* Ki, *Irak4*<sup>-/-</sup>, *MyD88*<sup>-/-</sup>, *Trif*<sup>-/-</sup> and *MyD88*<sup>-/-</sup>*Trif*<sup>-/-</sup> BMDMs treated with Poly(I:C) (10  $\mu\text{g mL}^{-1}$ ) for 24 hours. All stimulations were done with R848 1  $\mu\text{g mL}^{-1}$ , Pam3CSK4 200 ng mL<sup>-1</sup>, or Poly(I:C) 10  $\mu\text{g mL}^{-1}$ . \*p<0.05 in comparison to WT (one-way analysis of variance with Tukey's multiple comparisons test). Data from three (**a-b**, **e**, **i-m**) or two (**g-h**) independent experiments (mean and s.e.m.). (**c-d**, **f**) Images are representative of two (**f**) or three (**c-d**) independent experiments.

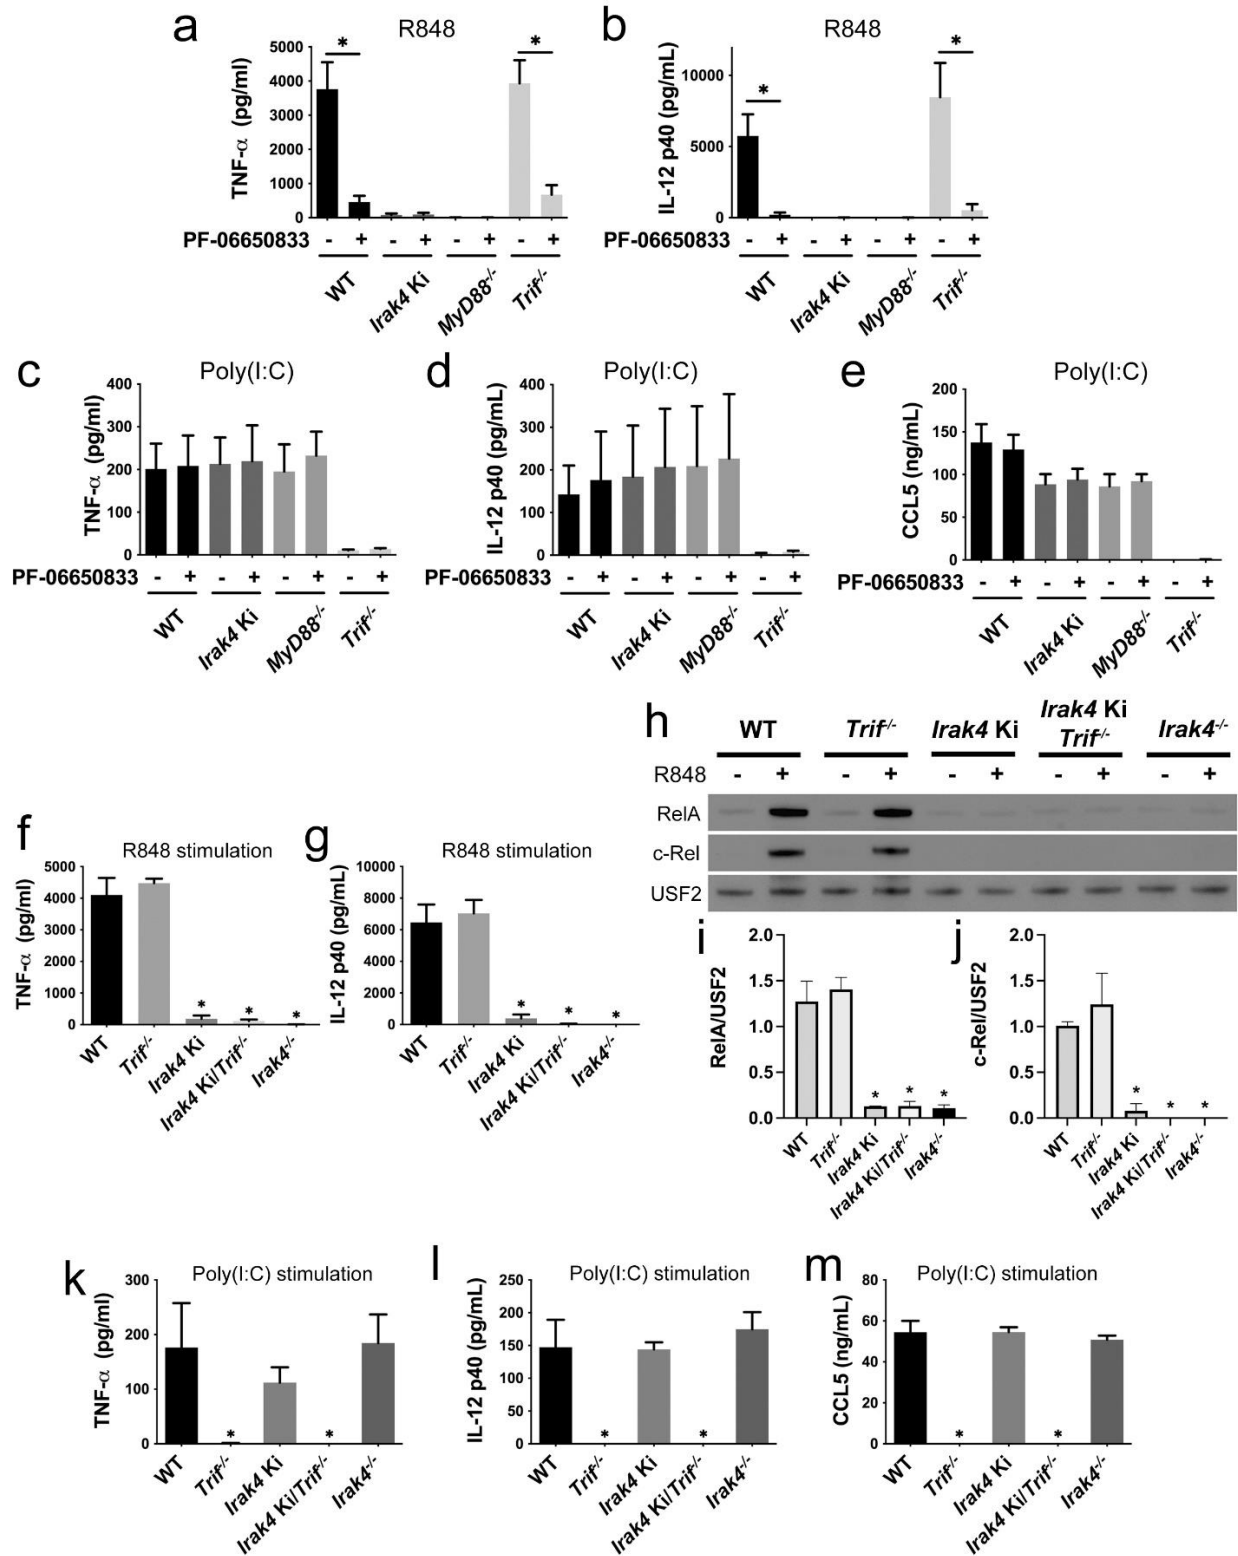

**Figure S4 – IRAK4 inhibition affects cytokine production via TLR7 but not TLR3, Related to Figure 3 and 4.**

(a-e) Quantification of TNF- $\alpha$  (a,c), IL-12 (b,d) and CCL5 (e) produced by BMDMs treated with R848 (a-b) or Poly(I:C) (c-e) for 24 hours. (f-m) WT, *Irak4* Ki, *Trif*<sup>-/-</sup>, *Irak4* Ki/*Trif*<sup>-/-</sup> and *Irak4*<sup>-/-</sup> BMDMs stimulated with R848

and Poly(I:C). **(f-g)** Quantification of TNF- $\alpha$  **(f)** and IL-12 **(g)** produced after stimulation with R848 for 24 hours. **(h)** Immunoblot analysis of RelA and c-Rel in nuclear lysates of WT, *Irak4* Ki, *Trif*<sup>-/-</sup>, *Irak4* Ki/*Trif*<sup>-/-</sup> and *Irak4*<sup>-/-</sup> BMDMs untreated or treated with R848 for 15 minutes and densitometric quantification of R848-treated samples **(i-j)**. **(k-m)** Quantification of TNF- $\alpha$  **(f)**, IL-12 **(g)** and CCL5 **(h)** produced by WT, *Trif*<sup>-/-</sup>, *Irak4* Ki, *Irak4* Ki/*Trif*<sup>-/-</sup> and *Irak4*<sup>-/-</sup> BMDMs treated with Poly(I:C) for 24 hours. All stimulations were done with R848 1  $\mu\text{g mL}^{-1}$  or Poly(I:C) 10  $\mu\text{g mL}^{-1}$ . \* $p < 0.05$  in comparison to WT unless indicated otherwise (one-way analysis of variance with Tukey's multiple comparisons test). Data from two **(i-j)** or three **(a-e, f-g, k-m)** independent experiments (mean and s.e.m.). **(h)** Images are representative of two independent experiments.



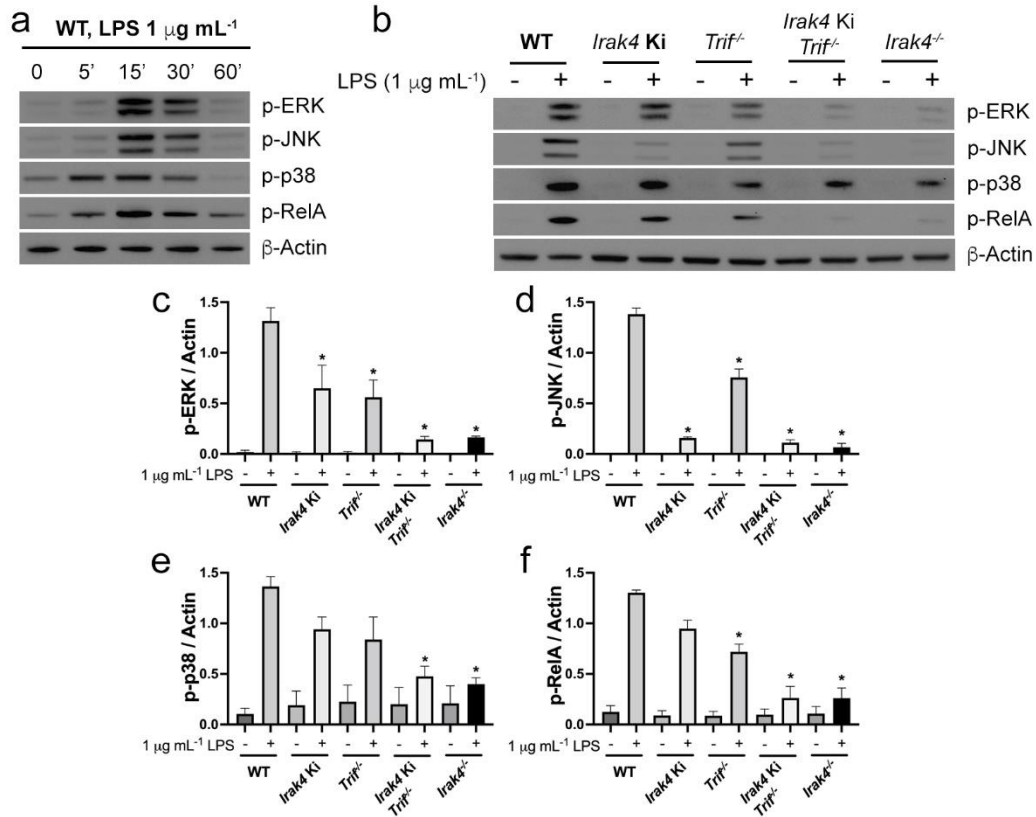

**Figure S5 – MAPK and RelA activation in IRAK-deficient cells stimulated with 1  $\mu\text{g mL}^{-1}$  of LPS, Related to Figure 4.**

(a) Kinetic study of p-ERK, p-JNK, p-p38, p-RelA and  $\beta$ -actin by immunoblot of whole cell lysates from WT, BMDMs treated with LPS (1  $\mu\text{g mL}^{-1}$ ) for up to 60 minutes. (b-f) ERK, JNK, p38 and RelA phosphorylation and densitometric quantifications in relation to  $\beta$ -actin in WT, *Irak4* Ki, *Trif*<sup>-/-</sup>, *Irak4* Ki, *Trif*<sup>-/-</sup>, and *Irak4*<sup>-/-</sup> BMDMs unstimulated or stimulated with LPS (1  $\mu\text{g mL}^{-1}$ ) for 15 minutes. \* $p < 0.05$  in comparison to WT (one-way analysis of variance with Tukey's multiple comparisons test) (a-b) Images are representative of two (a) or three (b) independent experiments. (c-f) Data from three independent experiments (mean and s.e.m.).

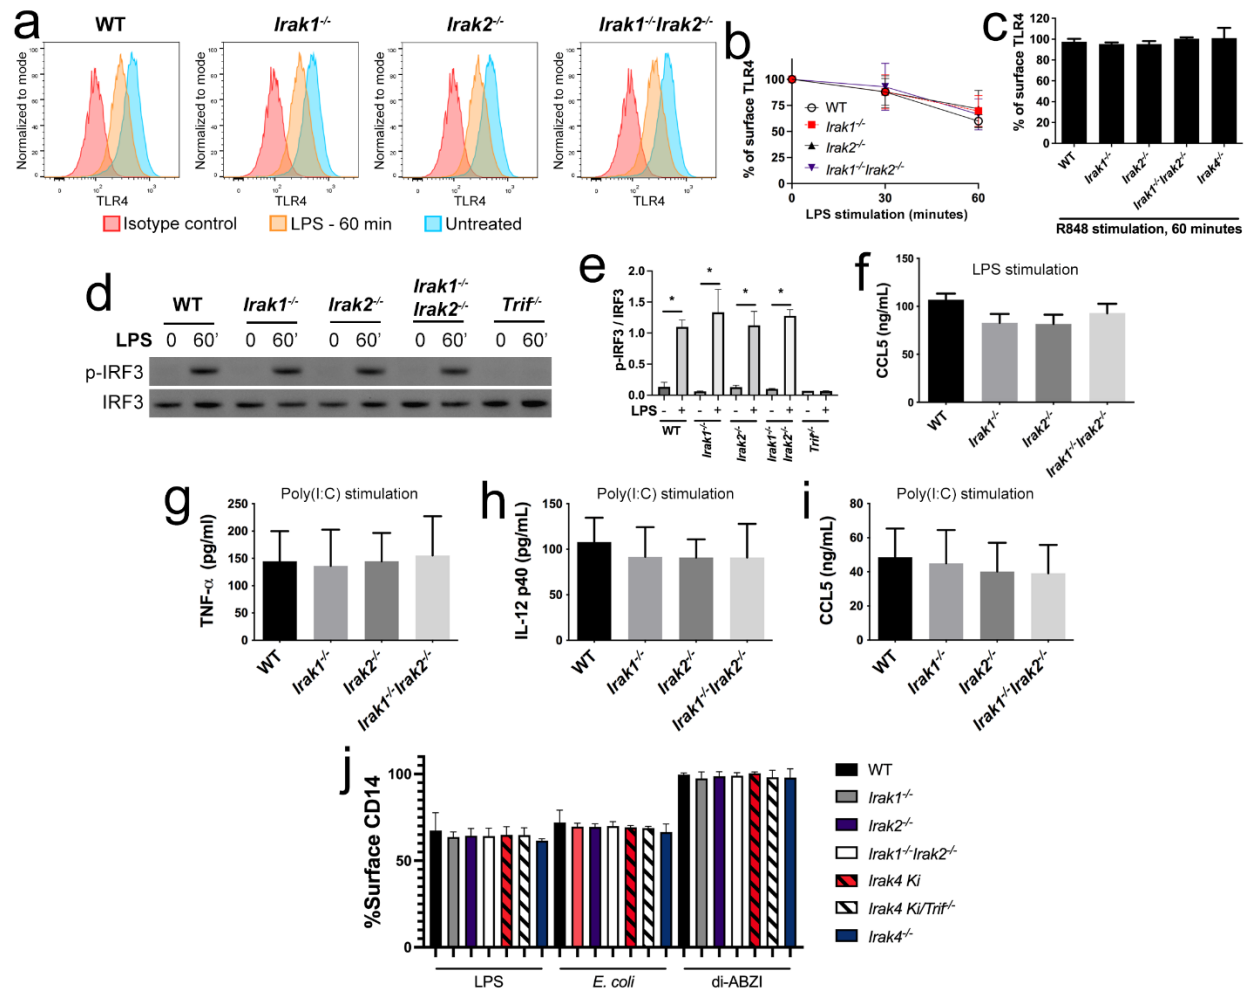

**Figure S6 – IRAK1, IRAK2 and IRAK4 are not involved in TLR3- and TLR4-mediated TRIF signaling, Related to Figure 5.**

(a-b) TLR4 endocytosis in WT, *Irak1*<sup>-/-</sup>, *Irak2*<sup>-/-</sup> and *Irak1*<sup>-/-</sup>*Irak2*<sup>-/-</sup> BMDMs stimulated with LPS for up to 60 minutes. (a) Histogram of surface TLR4 in the indicated strains unstimulated, stimulated with LPS for 60 minutes, or unstimulated cells stained with isotype control antibody. (b) Quantification of surface TLR4 after LPS stimulation for up to 60 minutes. (c) Quantification of surface TLR4 in BMDMs stimulated with R848 (used here as negative control for TLR4 endocytosis) for 60 minutes. (d) IRF3 phosphorylation of whole cell lysates from WT, *Irak1*<sup>-/-</sup>, *Irak2*<sup>-/-</sup> and *Irak1*<sup>-/-</sup>*Irak2*<sup>-/-</sup> BMDMs and (e) densitometric analysis. (f) Quantification of CCL5 produced by WT, *Irak1*<sup>-/-</sup>, *Irak2*<sup>-/-</sup> and *Irak1*<sup>-/-</sup>*Irak2*<sup>-/-</sup> BMDMs after stimulation with LPS for 24 hours. (g-i) Quantification of TNF-α (g), IL-12 (h) and CCL5 (i) produced by WT, *Irak1*<sup>-/-</sup>, *Irak2*<sup>-/-</sup> and *Irak1*<sup>-/-</sup>*Irak2*<sup>-/-</sup> BMDMs treated with Poly(I:C) for 24 hours. (j) CD14 endocytosis in WT or IRAK-deficient BMDMs stimulated for 30 minutes with LPS, *E. coli* Bort, or di-ABZI (negative control). All stimulations were done with LPS 100 ng mL<sup>-1</sup>, R848 1 μg mL<sup>-1</sup>, Poly(I:C) 10 μg mL<sup>-1</sup>, *E. coli* Bort MOI 1 and di-ABZI. 1 μg mL<sup>-1</sup>. \*p<0.05 (one-way analysis of variance with Tukey's multiple comparisons test) (a) Data is representative of three independent experiments. (d) Images are representative of two independent experiments. Data from two (e) or three (b-c, f-j) independent experiments (mean and s.e.m.).

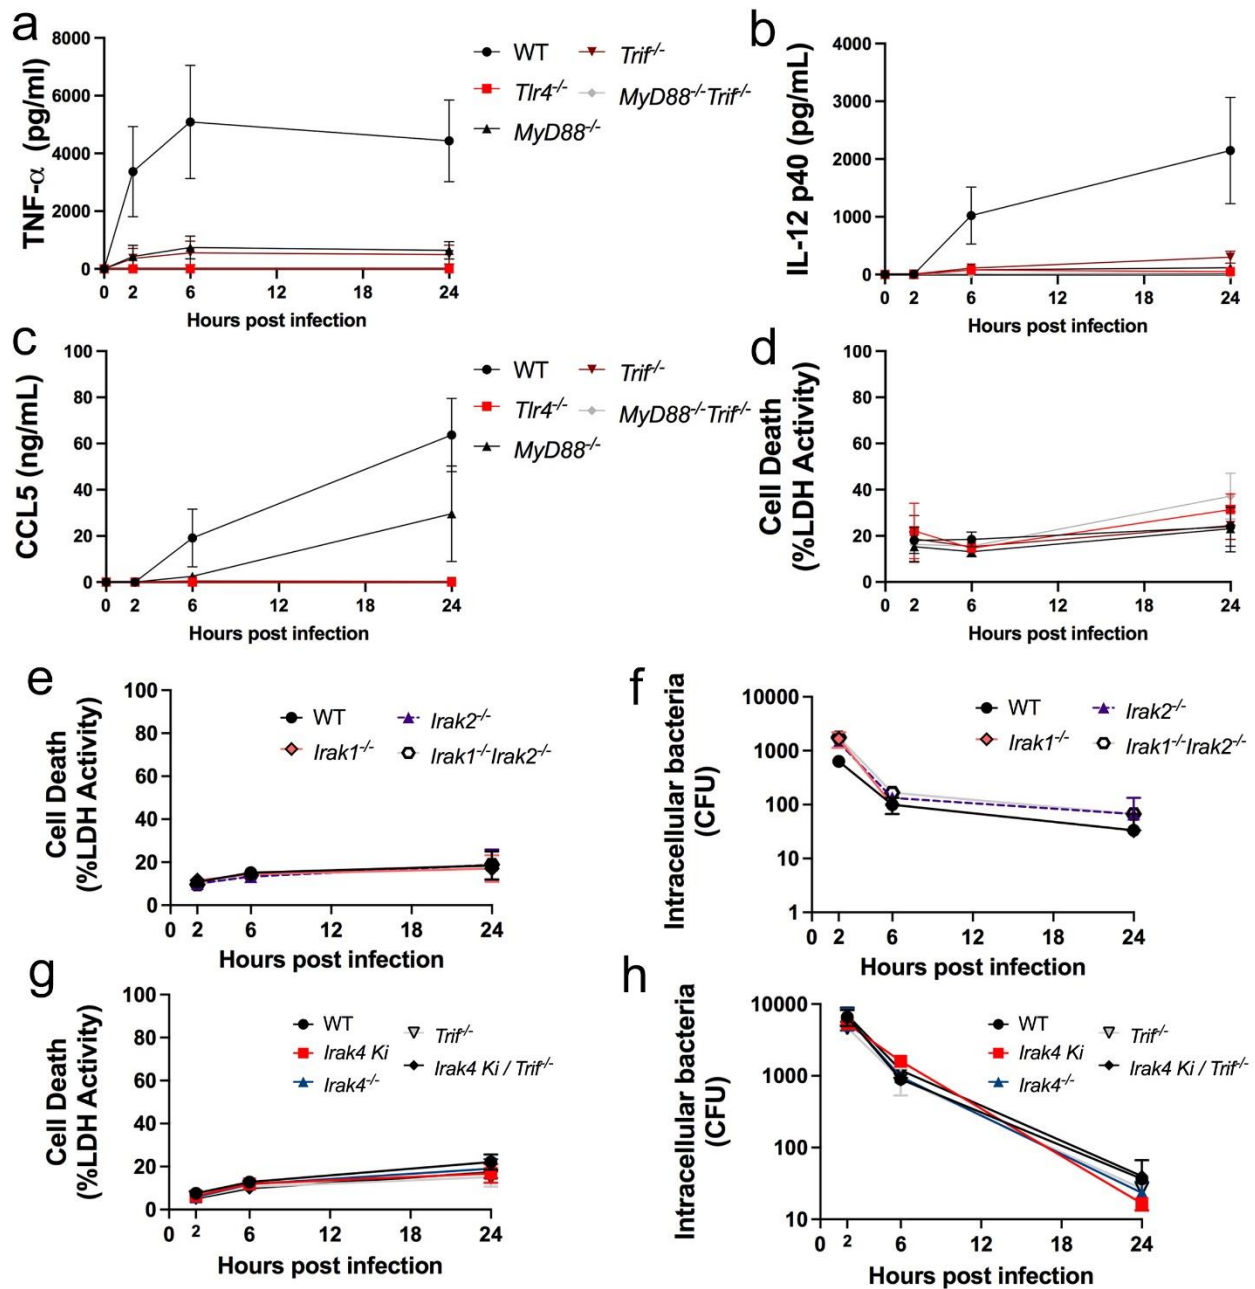

Figure S7 – Cytokine production and cell viability in response to *E. coli* Bort, Related to Figure 7.

(a-d) Production of TNF- $\alpha$  (a), IL-12 (b) CCL5 (c), and LDH release (d) in WT, *Tlr4*<sup>-/-</sup>, *MyD88*<sup>-/-</sup>, *Trif*<sup>-/-</sup> and *MyD88*<sup>-/-</sup>*Trif*<sup>-/-</sup> BMDMs infected with *E. coli* Bort at MOI 1 for up to 24 hours. (e-f) LDH release (e) and viable intracellular bacteria (f) in WT, *Irak1*<sup>-/-</sup>, *Irak2*<sup>-/-</sup> and *Irak1*<sup>-/-</sup>*Irak2*<sup>-/-</sup> BMDMs infected with *E. coli* Bort for up to 24 hours at MOI 1. (g-h) LDH release (g) and viable intracellular bacteria (h) in WT, *Irak4* Ki, *Irak4*<sup>-/-</sup>, *Trif*<sup>-/-</sup> and *Irak4* Ki/*Trif*<sup>-/-</sup> BMDMs infected with *E. coli* Bort for up to 24 hours at MOI 1. (a-b, d-e) Data from three independent experiments (mean and s.e.m.). Data from two (f, h) or three (a-d, e, g) independent experiments (mean and s.e.m.).
